# Supplementary material for: Magnetoresistance in Au/1,4-benzene-dithiol/Au and Au/1,4-benzene-dimethanethiol/Au single-molecule junctions
Source: Royal Society of Chemistry journal article supplement (doi:10.1039/d5cp01321f), 2025-01-01
Supplement: d5cp01321f4.pdf [file d5cp01321f4.pdf]

## Supplementary Information

### Magnetoresistance in Au/1,4-benzene-dithiol/Au and Au/1,4-benzene-imethanethiol/Au single-molecule junctions

*Rachmat Andika,<sup>a</sup> Grace Gita Redhyka,<sup>b</sup> Ryo Yamada,<sup>a</sup> and Hirokazu Tada<sup>a,\*</sup>*

<sup>a</sup> Graduate School of Engineering Science

Osaka University

Toyonaka 5608531, Japan

E-mail: [tada.hirokazu.es@osaka-u.ac.jp](mailto:tada.hirokazu.es@osaka-u.ac.jp)

<sup>b</sup> Research Center for Quantum Physics, National Research and Innovation Agency (BRIN),  
Tangerang Selatan, 15314, Indonesia

Figure S1 shows the MR curves before and after the Savitsky-Golay filtering, which is one of the smoothing methods. This method interpolates the data using a polynomial function and performs a centered moving average.<sup>1</sup> This method is implemented with popular data analysis software such as Origin and Matlab and is often used to remove noise without altering the original data's tendency. As shown in Figure S1, the smoothed resistance did not change the tendency of the raw data.

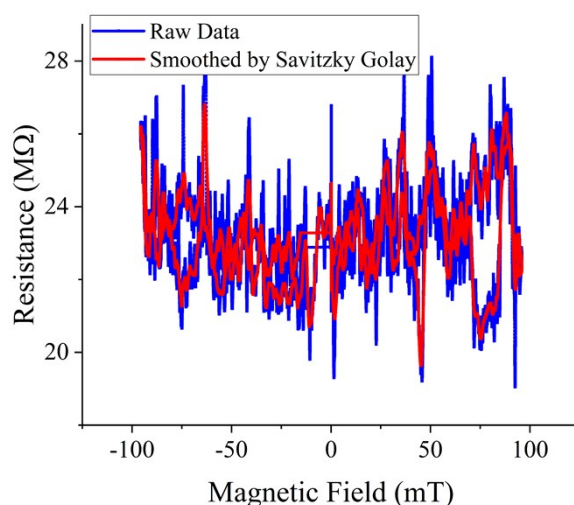

Figure S1. The raw (blue line) and smoothed (red line) MR data curves.

Figure S2 shows the time series data of MR.

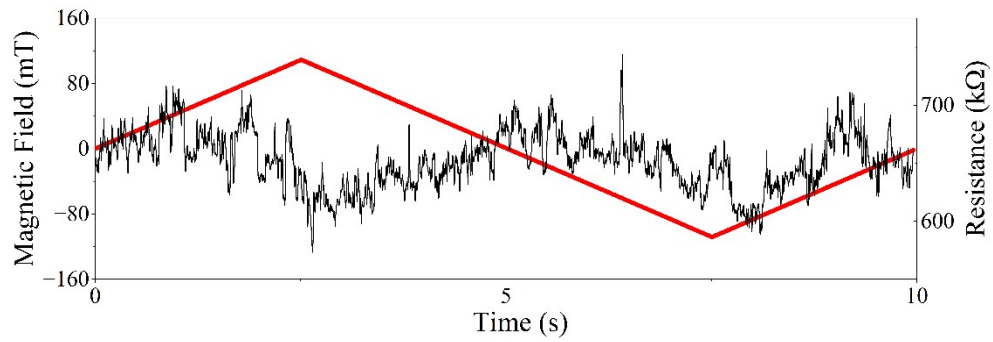

Figure S2. Time series data of a magnetic field (red) and resistance (black).

## Reference

- 1 R. W. Schafer, What is a savitzky-golay filter?, *IEEE Signal Process Mag*, 2011, 28, 111–117.
